# Supplementary material
Source: ML conference proceedings conference paper supplement (https://openaccess.thecvf.com/content/ICCV2023/html/Hagemann_Deep_Geometry-Aware_Camera_ICCV_2023_paper.html)
Supplement: Supplementary file 1 [file Hagemann_Deep_Geometry-Aware_Camera_ICCV_2023_supplemental.pdf]

# Supplementary Material for Deep geometry-aware camera self-calibration from video

Annika Hagemann<sup>1,2</sup>, Moritz Knorr<sup>1</sup>, Christoph Stiller<sup>2</sup>

<sup>1</sup>Bosch Research, Germany <sup>2</sup>Karlsruhe Institute of Technology

{annika.hagemann, moritzmichael.knorr}@de.bosch.com, stiller@kit.edu

## A. Derivation of the intrinsics Jacobian

The optimization in the self-calibrating bundle adjustment layer requires the Jacobian of optimization residuals w.r.t. poses, depth and intrinsics. The Jacobians w.r.t. poses and depth were derived in [11]. In the following, we derive the Jacobian w.r.t. the intrinsics. The optimization residuals are given by

$$\mathbf{r}_{ij} = \mathbf{u}_{ij}^* - \pi(\mathbf{G}_{ij} \circ \pi^{-1}(\mathbf{u}_i, z_i, \boldsymbol{\theta}), \boldsymbol{\theta}), \quad (1)$$

where  $\mathbf{u}_i$  denotes the image coordinates in image  $i$  and  $\mathbf{u}_{ij}^*$  denotes the measured correspondences.  $\mathbf{G}_{ij} \in SE(3)$  denotes the relative camera pose,  $z_i$  denotes the depth, and  $\boldsymbol{\theta}$  are the intrinsic camera parameters. The function  $\pi$  describes the projection from 3D to the image, and  $\pi^{-1}$  the inverse projection.

As (1) contains direct and indirect dependencies of  $\boldsymbol{\theta}$ , we define  $\mathbf{x}_{ij}(\boldsymbol{\theta}) := \mathbf{G}_{ij} \circ \pi^{-1}(\mathbf{u}_i, z_i, \boldsymbol{\theta})$  and obtain the Jacobian w.r.t.  $\boldsymbol{\theta}$  by using the total derivative:

$$\frac{d\mathbf{r}_{ij}}{d\boldsymbol{\theta}} = -\frac{d}{d\boldsymbol{\theta}}\pi(\mathbf{x}_{ij}(\boldsymbol{\theta}), \boldsymbol{\theta}) \quad (2)$$

$$= -\frac{\partial\pi(\mathbf{x}_{ij}, \boldsymbol{\theta})}{\partial\mathbf{x}_{ij}} \frac{d\mathbf{x}_{ij}(\boldsymbol{\theta})}{d\boldsymbol{\theta}} - \frac{\partial\pi(\mathbf{x}_{ij}, \boldsymbol{\theta})}{\partial\boldsymbol{\theta}} \quad (3)$$

To obtain  $\frac{d\mathbf{x}_{ij}(\boldsymbol{\theta})}{d\boldsymbol{\theta}}$ , we further re-write the pose transformation  $\mathbf{G}_{ij}$  in terms of a rotation matrix  $\mathbf{R}_{ij}$  and a translation vector  $\mathbf{t}_{ij}$ , so that  $\mathbf{x}_{ij}(\boldsymbol{\theta}) = \mathbf{R}_{ij}\pi^{-1}(\mathbf{u}_i, z_i, \boldsymbol{\theta}) + \mathbf{t}_{ij}$ . We then get

$$\frac{d\mathbf{x}_{ij}(\boldsymbol{\theta})}{d\boldsymbol{\theta}} = \mathbf{R}_{ij} \frac{d\pi^{-1}(\mathbf{u}_i, z_i, \boldsymbol{\theta})}{d\boldsymbol{\theta}} \quad (4)$$

Substituting this expression in (2) gives

$$\frac{d\mathbf{r}_{ij}}{d\boldsymbol{\theta}} = -\underbrace{\frac{\partial\pi(\mathbf{x}_{ij}, \boldsymbol{\theta})}{\partial\mathbf{x}_{ij}}}_{(A)} \mathbf{R}_{ij} \underbrace{\frac{d\pi^{-1}(\mathbf{u}_i, z_i, \boldsymbol{\theta})}{d\boldsymbol{\theta}}}_{(B)} - \underbrace{\frac{\partial\pi(\mathbf{x}_{ij}, \boldsymbol{\theta})}{\partial\boldsymbol{\theta}}}_{(C)}. \quad (5)$$

This general expression holds independent of the choice of the camera model. The terms (A), (B), (C), however, must be determined specifically for the given projection function.

For a pinhole camera model, for instance, projection and inverse projection are given by

$$\pi(\mathbf{x}, \boldsymbol{\theta}) = \begin{bmatrix} f_x \frac{x}{z} + c_x \\ f_y \frac{y}{z} + c_y \end{bmatrix} \quad \text{and} \quad \pi^{-1}(\mathbf{u}, \boldsymbol{\theta}, z) = z \begin{bmatrix} \frac{p_x - c_x}{f_x} \\ \frac{p_y - c_y}{f_y} \\ 1 \end{bmatrix}. \quad (6)$$

where  $\mathbf{x} = (x, y, z)^\top$  is a 3D point,  $\mathbf{u} = (p_x, p_y)^\top$  is an image point,  $(c_x, c_y)$  is the principal point and  $f_x, f_y$  are the focal lengths. By computing the individual derivatives, we obtain the following terms:

$$\frac{\partial\pi(\mathbf{x}_{ij}, \boldsymbol{\theta})}{\partial\mathbf{x}_{ij}} = \begin{bmatrix} \frac{f_x}{z_{ij}} & 0 & -f_x \frac{x_{ij}}{z_{ij}^2} \\ 0 & \frac{f_y}{z_{ij}} & -f_y \frac{y_{ij}}{z_{ij}^2} \end{bmatrix} \quad (7)$$

$$\frac{d\pi^{-1}(\mathbf{u}_i, z_i, \boldsymbol{\theta})}{d\boldsymbol{\theta}} = \begin{bmatrix} -z_i \frac{p_x - c_x}{f_x^2} & 0 & -\frac{z_i}{f_x} & 0 \\ 0 & -z_i \frac{p_y - c_y}{f_y^2} & 0 & -\frac{z_i}{f_y} \\ 0 & 0 & 0 & 0 \end{bmatrix} \quad (8)$$

$$\frac{\partial\pi(\mathbf{x}_{ij}, \boldsymbol{\theta})}{\partial\boldsymbol{\theta}} = \begin{bmatrix} \frac{x_{ij}}{z_{ij}} & 0 & 1 & 0 \\ 0 & \frac{y_{ij}}{z_{ij}} & 0 & 1 \end{bmatrix} \quad (9)$$

These matrices can be substituted in Eq. (5) to obtain the overall Jacobian of the residuals w.r.t. the pinhole intrinsics.

## B. Application on YouTube videos

As self-calibration enables performing 3D perception tasks without any knowledge about the camera, we applied DroidCalib on exemplary YouTube videos. From the YouTube8M dataset [1], we manually selected videos taken by a moving camera and extracted video snippets that did not contain any cuts. As all videos contained lens distortion, we used DroidCalib with UCM, initialized with naive intrinsics  $\boldsymbol{\theta}_0$ . The resulting reconstructions are shown in Fig. S1. Although a quantitative evaluation is not possible due to lack of ground-truth, the reconstructions are visually consistent (e.g. right angles, straight lines).

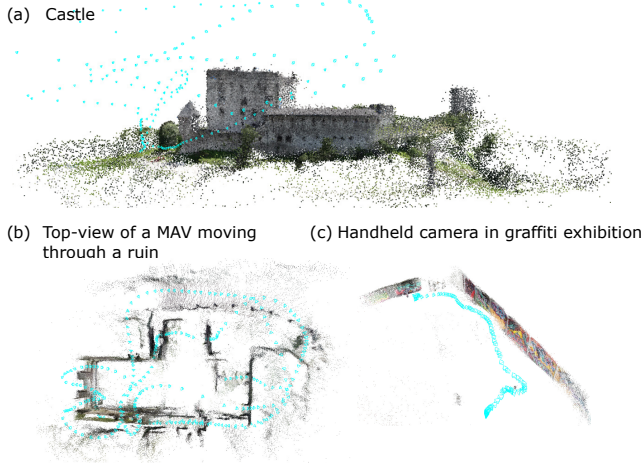

Figure S1. Qualitative results on YouTube videos. Cyan pyramids show the reconstructed camera poses. YouTube8M IDs are *mHQ5*, *RB1V*, *TnVx*, to obtain the associated video links, use [YouTube8M](#).

### C. Effect of different training setups

To investigate the effect of the specific training setup on the calibration accuracy, we compare the calibration accuracy achieved with four different setups (Fig. S2):

1. **Weights A** are the weights obtained through training with SC-BA layer, exposing the model to random initial intrinsics errors  $\Delta\theta$  during training, and using a dedicated intrinsics loss  $L_\theta$ . These are the weights used for all main analyses.
2. **Weights B** are obtained through training with SC-BA layer, including random initial intrinsics errors  $\Delta\theta$ , but without explicit intrinsics loss  $L_\theta$ .
3. **Weights C** are obtained through training with SC-BA layer, without explicit intrinsics loss  $L_\theta$ , and without exposing the model to random initial intrinsics errors  $\Delta\theta$  during training.
4. **Weights D** are the pre-trained weights from DROID-SLAM [11], obtained through training with the original BA layer, and without exposing the model to random initial intrinsics errors  $\Delta\theta$  during training. The SC-BA layer is thus only integrated at inference time.

Evaluation is performed on validation sequences from the TartanAir dataset<sup>1</sup>, using naive initial intrinsics  $\theta_0$ , and using random sequence snippets of different length (Fig. S2). The results suggest that for sufficiently long sequences ( $N_{\mathcal{I}} = 500$ ), all training setups result in high calibration accuracy. Even the weights obtained through train-

<sup>1</sup>Sequences neighborhood/Easy/P021, abandonedfactory/Hard/P011, office/Hard/P007, westerndesert/Easy/P013, gascola/Hard/P009.

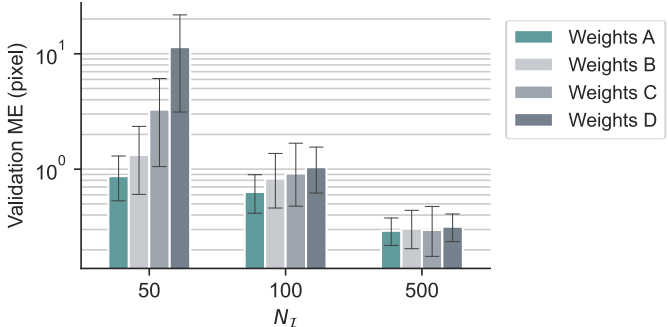

Figure S2. Comparison of different training setups depending on the length  $N_{\mathcal{I}}$  of the input sequence. Evaluation is performed on random sequence snippets from the TartanAir validation sequences. Barplot shows average mapping error and 95% bootstrap confidence intervals across sequence snippets.

ing for pose estimation only (**weights D**) yield accurate intrinsics when combined with the SC-BA layer at inference time. For short sequences ( $N_{\mathcal{I}} = 50$ ), however, the results obtained with the different training setups differ. The model weights obtained through training with SC-BA layer (**weights A-C**) result in higher calibration accuracy than the weights obtained through training without SC-BA layer (i.e. the pre-trained **weights D**). Furthermore, Fig. S2 indicates that the intrinsics loss  $L_\theta$ , and the exposure to intrinsics errors  $\Delta\theta$  during training are beneficial for the calibration accuracy on short sequences. Overall, this suggests that for long sequences, calibration is little sensitive to modifications in the training setup, whereas for short sequences, a dedicated intrinsics training improves the convergence to accurate intrinsics.

### D. Performance depending on sequence length

We analyzed calibration accuracy, runtime and memory consumption depending on the length of the input sequence. To this end, we applied DroidCalib on random sequence snippets of different length (Fig. S3). For TartanAir and EuRoC, a mapping error below 1 pixel is achieved even with short sequences, containing less than 200 images. Then, the median peak memory consumption is between 7 GB and 10 GB and the computation time is below two minutes. For the more difficult TUM sequences, the mapping error remains at a higher level, even for sequences containing 900 images. This indicates that it is difficult to compensate the quality of a sequence (amounts of artifacts, amount and diversity of camera motion, structure in the scene) with a larger quantity of images.

### E. Additional details on the baseline evaluation

**DroidCalib and DROID-SLAM** DroidCalib builds upon the DROID-SLAM [11] open source implementation (<https://github.com/princeton-vl/DROID-SLAM>, commit

| Method                              | ME (pixel)         | Runtime                                 | Failures |
|-------------------------------------|--------------------|-----------------------------------------|----------|
| COLMAP sequential                   | 9.69 [2.42, 24.95] | 2 min [1 min, 6 min]                    | 4 / 9    |
| COLMAP exhaustive                   | 4.26 [2.46, 6.89]  | 2 h 19 min [46 min, 2 days 18 h 15 min] | 0 / 9    |
| COLMAP+NetVLAD                      | 6.54 [2.52, 52.1]  | 4 min [2 min, 36 min]                   | 0 / 9    |
| COLMAP+NetVLAD+Superpoint+Superglue | 4.10 [1.66, 8.09]  | 13 min [5 min, 51 min]                  | 2 / 9    |

Table S1. Results of the COLMAP-based approaches on the TUM dataset, using different hyperparameters. We report median [min, max] over all converged sequences of the respective method. Failed sequences are only excluded from the method with the failure; not from all sequences. In general, there is a trade-off between runtime and accuracy. Although exhaustive matching leads to most accurate results, the runtime takes up to several days. In the main paper, we report COLMAP+NetVLAD and COLMAP+NetVLAD+Superpoint+Superglue, as they provide a balance between accuracy and runtime. For this supplementary analysis, we only used the TUM dataset, as it contains the shortest sequences and therefore enabled the evaluation of exhaustive matching.

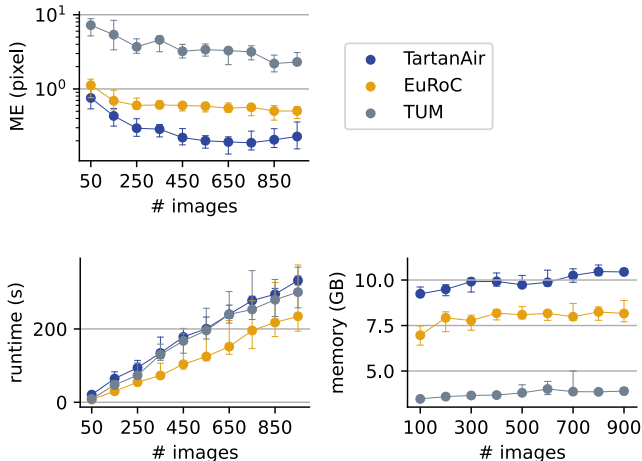

Figure S3. Calibration accuracy, runtime and peak memory consumption of DroidCalib depending on the number of input images. Plots show median values and 95% bootstrap confidence intervals on random sequence snippets of different length, with  $\Delta_\theta = 25\%$ .

8016d2b9b72). A full estimation consists of (i) running the frontend until all images of the sequence have been registered, (ii) running a total of 19 iterations of the backend, and (iii) running a motion-only bundle adjustment to estimate the poses of all images that had not been selected as keyframes. DroidCalib performs the self-calibrating bundle adjustment in both, frontend and backend. We did not tune any hyperparameters of the SLAM system specifically for DroidCalib, but used the values proposed in DROID-SLAM for evaluating both, DROID-SLAM and DroidCalib. For DROID-SLAM, we found that the reproduced ATE values deviate slightly from the published values, though not systematically. We report the reproduced rather than the published values so that differences to DroidCalib can be fully attributed to the SC-BA layer.

**Target-based calibration** We used the calibration datasets provided in the EuRoC and the TUM datasets. Both datasets contain more than 500 images of a checkerboard target, captured using different relative poses between camera and target. To assess the accuracy of target-based cal-

ibration, we randomly sampled calibration datasets of different sizes (20, 50 and 100 images) from the available checkerboard images and performed an undistortion using the reference intrinsics. Thereby, only pinhole intrinsics must be estimated during calibration, giving a fair comparison with the corresponding DroidCalib results. We used a corner detection algorithm [9] to detect the image coordinates of the checkerboard corners. Following Zhang’s method [12], we then used the direct linear transform to obtain initial values for the target poses and estimated the intrinsics by minimizing the reprojection error

$$\epsilon_{\text{res}}^2 = \sum_{\nu \in \mathcal{F}} \sum_{c \in \mathcal{C}} \|\mathbf{u}_{c\nu} - \pi(\mathbf{G}_\nu \circ \mathbf{x}_c, \boldsymbol{\theta})\|^2, \quad (10)$$

where  $\mathcal{F}$  denotes the set of calibration images,  $\mathcal{C}$  denotes the set of visible checkerboard corners,  $\mathbf{u}_{c\nu}$  are the detected image coordinates of checkerboard corners,  $\mathbf{x}_c$  are the 3D coordinates of the checkerboard corners w.r.t. the board coordinate system, and  $\mathbf{G}_\nu$  is the relative pose between board and camera in image  $\nu$ . To reduce the impact of potential outliers, the error terms are weighted with a Cauchy kernel, and optimization is performed using the Levenberg Marquardt algorithm.

**COLMAP-based approaches** We used COLMAP 3.8 and hloc version 1.1 [8] and activated the estimation of all intrinsics during reconstruction. We used the same image sizes as for DroidCalib (see main paper) and we did not skip any frames. In the default setup, we used SIFT [6] feature extraction and performed feature matching using the nearest neighbor ratio configuration from hloc [8]. For feature extraction with Superpoint [3], we used the trained model from the InLoc dataset [10], as provided in hloc [8]. The performance of COLMAP-based approaches depends on the image pairs considered during feature matching and there is a trade-off between accuracy and runtime. Tab. S1 shows the the calibration accuracy using different possible configurations, including sequential matching with a window of five images, NetVLAD and exhaustive matching.

| Dataset   | Setting      | ME (pixel) | Runtime      |            |
|-----------|--------------|------------|--------------|------------|
| TartanAir | 50 epochs    | 18.3       | [5.0, 60.1]  | 28 min     |
|           | 350 epochs   | 14.9       | [2.95, 64.8] | 3 h 08 min |
|           | full dataset | 3.52       | [-, -]       | 5 h 36 min |
| EuRoC     | 50 epochs    | 27.6       | [14.0, 56.2] | 53 min     |
|           | 350 epochs   | 24.1       | [11.1, 47.4] | 6 h 11 min |
|           | full dataset | 6.48       | [-, -]       | 8 h 19 min |
| TUM       | 50 epochs    | 29.7       | [17.6, 44.5] | 25 min     |
|           | 350 epochs   | 24.7       | [16.2, 63.6] | 3 h 35 min |
|           | full dataset | 4.31       | [-, -]       | 2 h 51min  |
| EuRoC raw | 50 epochs    | 10.8       | [1.63, 47.9] | 53 min     |
|           | 350 epochs   | 10.7       | [1.81, 55.9] | 6 h 05 min |
|           | full dataset | 2.24       | [-, -]       | 8 h 27min  |

Table S2. Results of SelfSup-Calib [4] using different settings. We report median [min, max] over all sequences in the respective dataset. For the "full dataset" setting we report the single result obtained from training 50 epochs jointly on all sequences.

**SelfSup-Calib** We used the author’s implementation to evaluate the method [4]. We left all hyperparameters untouched and we chose the unified camera model. The parametrization of the unified camera model in [4] is slightly different from the parametrization in [7], however, both parametrizations are mathematically equivalent and can be converted into each other (see [4]). As proposed in [4], the EuRoC images were resized to an input size of  $256 \times 384$ . As the TUM dataset and the TartanAir dataset were not evaluated in the original work, we used the same hyperparameters.

The work originally trained jointly on multiple EuRoC sequences. To obtain per-sequence results, we trained on the individual sequences. We also tried to compensate for the lower number of optimization steps by increasing the number of epochs from 50 to 350 (Tab. S2). This leads to slightly higher accuracy, but comes at the cost of a significant increase in the computation time. We further evaluated the method when training jointly on all sequences in the respective dataset (Tab. S2). This significantly increases the calibration accuracy, indicating that the method benefits from larger datasets and longer training times, as compared to the single-sequence setup assessed in this work.

**On the choice of baseline methods** Besides [4], the approaches in [5, 2], also use a CNN-based architecture to regress poses and depth from unknown cameras, and train in a self-supervised manner using a photometric loss. However, while [4] *learns* the intrinsics of the training data, [5, 2] *infer* intrinsics on a two-image basis, which is much more challenging, so that accuracy is by design expected to be lower (this is supported by Fig. 9 in [5]). In one experiment, [5] additionally *learns* the intrinsics, which we expect to yield similar accuracy as [4], because it relies on the same principle and only differs in the exact model architecture and the choice of the camera model. Among the two, we decided to use [4] as a representative approach, as it provides complete source code. In general, it must be noted that

there are no well-established benchmark datasets and metrics to compare different self-calibration approaches. We thus hope that our work is a step towards establishing such a benchmark.

## F. More detailed experimental results

Tabs. S3-S5 contain the per-sequence results of the experiments shown in the main paper.

## References

- [1] Sami Abu-El-Haija, Nisarg Kothari, Joonseok Lee, Paul Natsev, George Toderici, Balakrishnan Varadarajan, and Sudheendra Vijayanarasimhan. Youtube-8m: A large-scale video classification benchmark. *arXiv preprint arXiv:1609.08675*, 2016. 1
- [2] Yuhua Chen, Cordelia Schmid, and Cristian Sminchisescu. Self-supervised learning with geometric constraints in monocular video: Connecting flow, depth, and camera. In *Proceedings of the IEEE/CVF International Conference on Computer Vision*, pages 7063–7072, 2019. 4
- [3] Daniel DeTone, Tomasz Malisiewicz, and Andrew Rabinovich. Superpoint: Self-supervised interest point detection and description. In *Proceedings of the IEEE conference on computer vision and pattern recognition workshops*, pages 224–236, 2018. 3
- [4] Jiading Fang, Igor Vasiljevic, Vitor Guizilini, Rares Ambrus, Greg Shakhnarovich, Adrien Gaidon, and Matthew R Walter. Self-supervised camera self-calibration from video. In *2022 International Conference on Robotics and Automation (ICRA)*, pages 8468–8475. IEEE, 2022. 4
- [5] Ariel Gordon, Hanhan Li, Rico Jonschkowski, and Anelia Angelova. Depth from videos in the wild: Unsupervised monocular depth learning from unknown cameras. In *Proceedings of the IEEE/CVF International Conference on Computer Vision*, pages 8977–8986, 2019. 4
- [6] David G Lowe. Distinctive image features from scale-invariant keypoints. *International journal of computer vision*, 60:91–110, 2004. 3
- [7] Christopher Mei and Patrick Rives. Single view point omnidirectional camera calibration from planar grids. In *Proceedings 2007 IEEE International Conference on Robotics and Automation*, pages 3945–3950. IEEE, 2007. 4
- [8] Paul-Edouard Sarlin, Cesar Cadena, Roland Siegwart, and Marcin Dymczyk. From coarse to fine: Robust hierarchical localization at large scale. In *CVPR*, 2019. 3
- [9] Tobias Strauss, Julius Ziegler, and Johannes Beck. Calibrating multiple cameras with non-overlapping views using coded checkerboard targets. In *17th international IEEE conference on intelligent transportation systems (ITSC)*, pages 2623–2628. IEEE, 2014. 3
- [10] Hajime Taira, Masatoshi Okutomi, Torsten Sattler, Mircea Cimpoi, Marc Pollefeys, Josef Sivic, Tomas Pajdla, and Akihiko Torii. InLoc: Indoor visual localization with dense matching and view synthesis. In *CVPR*, 2018. 3

- [11] Zachary Teed and Jia Deng. Droid-slam: Deep visual slam for monocular, stereo, and rgb-d cameras. *Advances in Neural Information Processing Systems*, 34:16558–16569, 2021. [1](#), [2](#), [6](#)
- [12] Zhengyou Zhang. A flexible new technique for camera calibration. *IEEE Transactions on pattern analysis and machine intelligence*, 22(11):1330–1334, 2000. [3](#)

| Seq              | $\Delta_\theta = 0.0$ |              | $\Delta_\theta = 0.25$ |              |
|------------------|-----------------------|--------------|------------------------|--------------|
|                  | DroidSLAM             | DroidCalib   | DroidSLAM              | DroidCalib   |
| <b>TartanAir</b> |                       |              |                        |              |
| ME000            | <b>0.126</b>          | 0.408        | 1.983                  | <b>0.205</b> |
| ME001            | 0.041                 | <b>0.039</b> | 1.667                  | <b>0.032</b> |
| ME002            | 0.467                 | <b>0.403</b> | 11.463                 | <b>0.230</b> |
| ME003            | <b>0.595</b>          | 1.428        | 14.143                 | <b>0.904</b> |
| ME004            | <b>0.577</b>          | 1.509        | 7.296                  | <b>1.669</b> |
| ME005            | 0.189                 | <b>0.071</b> | 3.639                  | <b>0.094</b> |
| ME006            | 1.732                 | <b>0.902</b> | 2.071                  | <b>1.310</b> |
| ME007            | 0.076                 | <b>0.064</b> | 4.618                  | <b>0.064</b> |
| MH000            | <b>0.040</b>          | 0.077        | 33.391                 | <b>0.136</b> |
| MH001            | 0.634                 | <b>0.033</b> | 0.711                  | <b>0.041</b> |
| MH002            | 0.030                 | <b>0.018</b> | 2.284                  | <b>0.021</b> |
| MH003            | <b>0.019</b>          | 0.031        | 0.563                  | <b>0.014</b> |
| MH004            | 3.012                 | <b>1.601</b> | <b>1.757</b>           | 2.738        |
| MH005            | 0.622                 | <b>0.432</b> | 8.779                  | <b>0.400</b> |
| MH006            | 0.392                 | <b>0.104</b> | 2.924                  | <b>0.215</b> |
| MH007            | <b>0.065</b>          | 0.154        | 6.380                  | <b>0.136</b> |
| Median           | 0.291                 | <b>0.129</b> | 3.282                  | <b>0.170</b> |
| <b>EuRoC</b>     |                       |              |                        |              |
| MH_01            | <b>0.011</b>          | <b>0.011</b> | 0.187                  | <b>0.011</b> |
| MH_02            | 0.018                 | <b>0.012</b> | 0.182                  | <b>0.012</b> |
| MH_03            | 0.022                 | <b>0.021</b> | 1.746                  | <b>0.021</b> |
| MH_04            | 0.043                 | <b>0.039</b> | 0.437                  | <b>0.039</b> |
| MH_05            | <b>0.040</b>          | 0.041        | 0.398                  | <b>0.040</b> |
| V1_01            | 0.036                 | <b>0.031</b> | 0.148                  | <b>0.031</b> |
| V1_02            | 0.012                 | <b>0.011</b> | 0.398                  | <b>0.011</b> |
| V1_03            | 0.024                 | <b>0.013</b> | 0.269                  | <b>0.015</b> |
| V2_01            | 0.016                 | <b>0.012</b> | 1.053                  | <b>0.013</b> |
| V2_02            | <b>0.009</b>          | 0.079        | 0.166                  | <b>0.041</b> |
| V2_03            | 0.013                 | <b>0.011</b> | 0.909                  | <b>0.011</b> |
| Median           | 0.018                 | <b>0.013</b> | 0.398                  | <b>0.015</b> |
| <b>TUM</b>       |                       |              |                        |              |
| 360              | <b>0.061</b>          | 0.079        | <b>0.160</b>           | 0.179        |
| desk             | <b>0.018</b>          | 0.019        | 0.083                  | <b>0.019</b> |
| desk2            | <b>0.026</b>          | 0.069        | 0.109                  | <b>0.055</b> |
| floor            | 0.022                 | <b>0.017</b> | 0.234                  | <b>0.017</b> |
| room             | <b>0.043</b>          | 0.889        | 0.748                  | <b>0.548</b> |
| xyz              | <b>0.010</b>          | 0.011        | 0.023                  | <b>0.011</b> |
| rpy              | <b>0.023</b>          | 0.026        | 0.044                  | <b>0.026</b> |
| plant            | <b>0.017</b>          | 0.018        | 0.170                  | <b>0.018</b> |
| teddy            | 0.035                 | <b>0.034</b> | 0.137                  | <b>0.034</b> |
| Median           | <b>0.023</b>          | 0.026        | 0.137                  | <b>0.026</b> |

Table S3. Average trajectory error (ATE) in meters of DroidCalib and DROID-SLAM [11] for different initial errors in the intrinsics. Values show medians over three runs per sequence, using  $\Delta_\theta = 0\%$  and  $\Delta_\theta = 25\%$ . For DROID-SLAM, we report the reproduced results rather than the values originally published in [11], so that differences can be fully attributed to the self-calibrating bundle adjustment layer. The table is associated with Fig. 6 in the main paper.

|                     | $f_x$        | $f_y$        | $c_x$        | $c_y$        | ME (pixel)   |
|---------------------|--------------|--------------|--------------|--------------|--------------|
| <b>TartanAir</b>    |              |              |              |              |              |
| <b>Ground-truth</b> | <b>320.0</b> | <b>320.0</b> | <b>320.0</b> | <b>240.0</b> |              |
| ME000               | 320.2        | 320.3        | 320.0        | 240.1        | 0.12         |
| ME001               | 320.2        | 320.6        | 320.2        | 240.4        | 0.20         |
| ME002               | 320.6        | 320.7        | 320.5        | 241.0        | 0.34         |
| ME003               | 320.9        | 321.0        | 320.4        | 240.3        | 0.43         |
| ME004               | 321.8        | 321.5        | 320.7        | 239.9        | 0.79         |
| ME005               | 320.5        | 320.4        | 320.3        | 240.0        | 0.24         |
| ME006               | 320.8        | 320.6        | 320.5        | 240.5        | 0.35         |
| ME007               | 319.4        | 319.3        | 320.2        | 240.3        | 0.30         |
| MH000               | 320.2        | 320.2        | 320.3        | 240.0        | 0.09         |
| MH001               | 318.7        | 318.4        | 320.4        | 240.4        | 0.67         |
| MH002               | 320.2        | 320.1        | 320.2        | 240.2        | 0.11         |
| MH003               | 320.3        | 320.8        | 319.8        | 240.1        | 0.26         |
| MH004               | 320.5        | 320.4        | 320.2        | 239.4        | 0.23         |
| MH005               | 320.0        | 320.0        | 320.4        | 240.2        | 0.08         |
| MH006               | 320.1        | 320.0        | 320.4        | 240.7        | 0.13         |
| MH007               | 320.4        | 320.2        | 320.2        | 240.1        | 0.17         |
|                     |              |              |              |              | median: 0.23 |
| <b>EuRoC</b>        |              |              |              |              |              |
| <b>Ground-truth</b> | <b>458.7</b> | <b>457.3</b> | <b>367.2</b> | <b>248.4</b> |              |
| MH_01               | 457.9        | 457.9        | 368.0        | 249.1        | 0.28         |
| MH_02               | 457.9        | 457.1        | 367.8        | 248.5        | 0.25         |
| MH_03               | 457.9        | 458.2        | 368.0        | 250.2        | 0.34         |
| MH_04               | 457.4        | 457.2        | 367.7        | 249.1        | 0.38         |
| MH_05               | 458.3        | 457.8        | 367.9        | 248.6        | 0.16         |
| V1_01               | 459.1        | 459.0        | 368.2        | 250.0        | 0.42         |
| V1_02               | 459.4        | 459.4        | 367.9        | 249.7        | 0.49         |
| V1_03               | 459.6        | 459.5        | 368.3        | 249.4        | 0.55         |
| V2_01               | 459.2        | 459.7        | 368.2        | 249.7        | 0.52         |
| V2_02               | 459.5        | 459.8        | 367.8        | 249.9        | 0.58         |
| V2_02               | 459.5        | 459.9        | 367.8        | 250.0        | 0.59         |
| V2_03               | 460.2        | 460.1        | 368.2        | 249.5        | 0.74         |
|                     |              |              |              |              | median: 0.42 |
| <b>TUM</b>          |              |              |              |              |              |
| <b>Ground-truth</b> | <b>517.3</b> | <b>516.5</b> | <b>318.6</b> | <b>255.3</b> |              |
| 360                 | 530.2        | 529.4        | 320.4        | 261.1        | 3.71         |
| desk                | 531.7        | 527.5        | 321.0        | 248.4        | 3.70         |
| desk2               | 525.6        | 553.6        | 317.4        | 284.0        | 6.93         |
| floor               | 530.5        | 518.4        | 323.0        | 240.2        | 3.09         |
| room                | 523.2        | 526.1        | 320.9        | 261.8        | 2.22         |
| xyz                 | 523.4        | 504.0        | 325.3        | 281.2        | 3.03         |
| rpy                 | 531.2        | 532.7        | 323.7        | 276.2        | 4.66         |
| plant               | 525.4        | 527.3        | 319.5        | 254.3        | 2.58         |
| teddy               | 523.1        | 519.6        | 324.1        | 249.3        | 1.50         |
|                     |              |              |              |              | median: 3.09 |

Table S4. Accuracy of intrinsics estimated using DroidCalib. Values show estimated focal lengths  $f_x$ ,  $f_y$  and principal point  $c_x$ ,  $c_y$ , and the mapping error ME. This table is associated with Tab. 2 in the main paper and contains all evaluated sequences.

|                  | DroidCalib  | COLMAP+N    | COLMAP+N<br>+SP+SG | SelfSup-Calib |
|------------------|-------------|-------------|--------------------|---------------|
| <b>TartanAir</b> |             |             |                    |               |
| ME000            | <b>0.12</b> | 1.46        | 0.29               | 7.32          |
| ME001            | <b>0.20</b> | 1.01        | 1.34               | 8.72          |
| ME002            | 0.34        | 0.28        | <b>0.23</b>        | 11.03         |
| ME003            | <b>0.43</b> | 4.19        | 1.35               | 14.59         |
| ME004            | <b>0.79</b> | 1.76        | 10.77              | 8.86          |
| ME005            | <b>0.24</b> | —           | 0.36               | 22.04         |
| ME006            | 0.35        | 245.58      | <b>0.25</b>        | 5.00          |
| ME007            | 0.30        | <b>0.11</b> | 0.20               | 48.64         |
| MH000            | <b>0.09</b> | 0.86        | 0.59               | 8.30          |
| MH001            | 0.67        | 1349.43     | <b>0.60</b>        | 50.90         |
| MH002            | <b>0.11</b> | 0.24        | 0.44               | 43.41         |
| MH003            | <b>0.26</b> | 2.42        | 0.47               | 60.09         |
| MH004            | <b>0.23</b> | 2.39        | 0.51               | 57.18         |
| MH005            | <b>0.08</b> | 0.45        | 0.19               | 13.32         |
| MH006            | <b>0.13</b> | 20.56       | 0.31               | 50.86         |
| MH007            | <b>0.17</b> | 0.78        | 0.64               | 26.86         |
| <b>EuRoC</b>     |             |             |                    |               |
| MH_01            | <b>0.28</b> | 0.38        | 1.15               | 27.63         |
| MH_02            | <b>0.25</b> | 2.50        | 1.27               | 22.60         |
| MH_03            | <b>0.34</b> | 0.45        | 4.11               | 39.65         |
| MH_04            | <b>0.38</b> | 8.76        | 0.71               | 16.13         |
| MH_05            | <b>0.16</b> | 21.20       | 0.55               | 21.14         |
| V1_01            | <b>0.42</b> | 1.02        | 0.71               | 14.03         |
| V1_02            | 0.49        | 1.13        | <b>0.48</b>        | 32.27         |
| V1_03            | <b>0.55</b> | 2.20        | 1.25               | 56.15         |
| V2_01            | <b>0.52</b> | 1.77        | 1.19               | 24.01         |
| V2_02            | <b>0.58</b> | 9.65        | 0.70               | 49.49         |
| V2_03            | 0.74        | 1.16        | <b>0.42</b>        | 28.94         |
| <b>TUM</b>       |             |             |                    |               |
| 360              | <b>3.71</b> | 52.14       | —                  | 17.58         |
| desk             | <b>3.70</b> | 6.54        | 3.97               | 22.81         |
| desk2            | 6.93        | <b>2.53</b> | 5.02               | 23.04         |
| floor            | <b>3.09</b> | 10.07       | 8.09               | 29.73         |
| room             | <b>2.22</b> | 4.01        | 4.10               | 37.32         |
| xyz              | <b>3.03</b> | 19.16       | —                  | 33.12         |
| rpy              | <b>4.66</b> | 4.28        | 5.45               | 18.99         |
| plant            | 2.58        | 8.11        | <b>1.66</b>        | 32.78         |
| teddy            | <b>1.50</b> | 2.76        | 2.43               | 44.53         |
| <b>EuRoC raw</b> |             |             |                    |               |
| MH_01            | <b>0.32</b> | 2.92        | 1.07               | 6.12          |
| MH_02            | <b>0.31</b> | 3.08        | 0.66               | 1.63          |
| MH_03            | <b>0.33</b> | 3.60        | 3.89               | 14.93         |
| MH_04            | <b>0.35</b> | 31.10       | 6.14               | 9.09          |
| MH_05            | <b>0.36</b> | 11.17       | 3.11               | 7.08          |
| V1_01            | <b>0.40</b> | 5.10        | 3.83               | 47.88         |
| V1_02            | <b>0.43</b> | 7.58        | 5.25               | 29.20         |
| V1_03            | <b>0.56</b> | 3.73        | 2.05               | 5.94          |
| V2_01            | <b>0.80</b> | —           | 4.66               | 10.96         |
| V2_02            | <b>0.69</b> | 2.03        | 3.25               | 10.78         |
| V2_03            | <b>0.73</b> | 3.15        | 3.48               | 24.58         |

Table S5. Per-sequence results of the mapping error of self-calibration baselines. This table is associated with Tab. 1 in the main paper and shows the mapping error (ME) in units of pixels. Abbreviations are COLMAP+NetVLAD (COLMAP+N), COLMAP+NetVLAD+Superpoint+Superglue (COLMAP+N+SP+SG).
